# Supplementary material
Source: PubMed Central journal article supplement (PMC3255592)

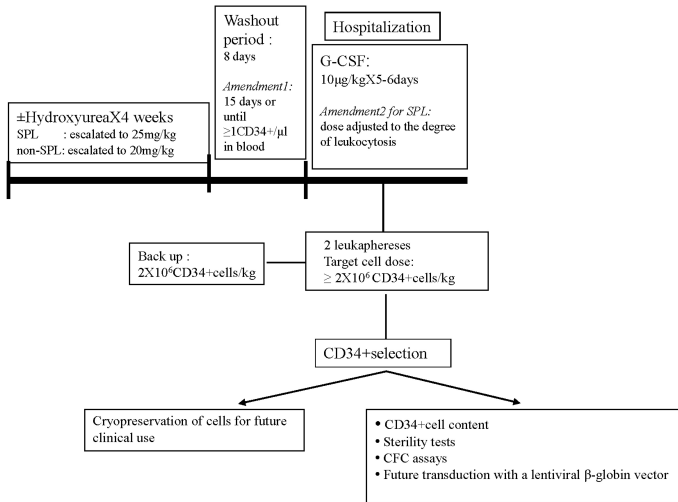

Supplement: mt2011195x1.pdf [file mt2011195x1.pdf]

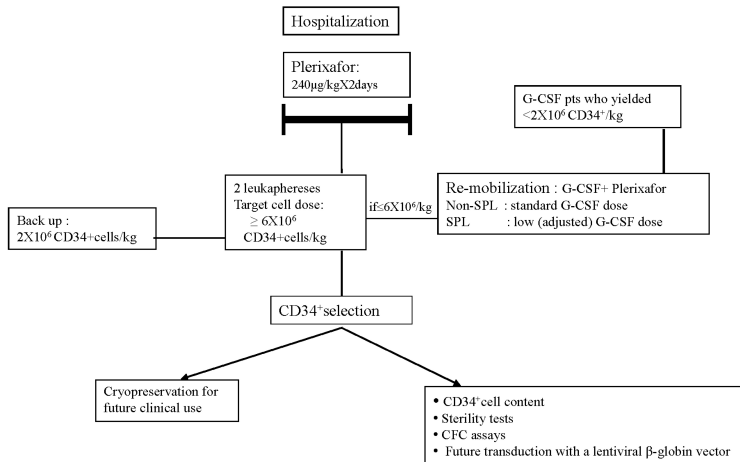

Supplement: mt2011195x2.pdf [file mt2011195x2.pdf]
